# Supplementary material for: Art, music, and play as a teaching aid: applying creative uses of Universal Design for Learning in a prison science class
Source: Frontiers journal article supplement (doi:10.3389/feduc.2025.1524007), 2025-02-28
Supplement: Data_Sheet_1.pdf [file Data_Sheet_1.pdf]

## W2: Climate Change

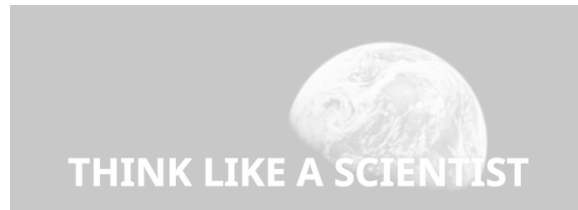

**Course:** *Think Like A Scientist*

**Instructor:** *Phil*

As we finish this second week, it would be amazing if we could get some feedback from you:

**Can you write down or draw any thing you remember from what we talked about regarding climate change?**

**What were the emotions that you felt during this class?**

# Pre-course Thoughts

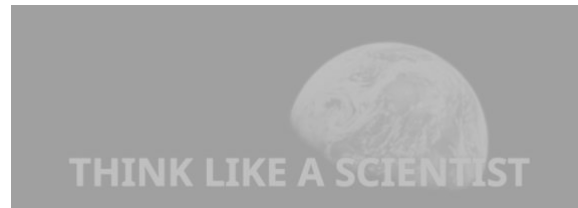

Course: *Think Like A Scientist*

Instructor: *Phil*

Rate the statement as it relates to you, feel free to use the space below each statement to add a comment:

|                                                 | <i>Strongly<br/>Agree</i> | <i>Agree</i>             | <i>Neutral</i>           | <i>Disagree</i>          | <i>Strongly<br/>Disagree</i> |
|-------------------------------------------------|---------------------------|--------------------------|--------------------------|--------------------------|------------------------------|
| "I read about science in my free time"          | <input type="checkbox"/>  | <input type="checkbox"/> | <input type="checkbox"/> | <input type="checkbox"/> | <input type="checkbox"/>     |
| "I enjoy learning about scientific discoveries" | <input type="checkbox"/>  | <input type="checkbox"/> | <input type="checkbox"/> | <input type="checkbox"/> | <input type="checkbox"/>     |
| "Science is for everyone"                       | <input type="checkbox"/>  | <input type="checkbox"/> | <input type="checkbox"/> | <input type="checkbox"/> | <input type="checkbox"/>     |
| "Science is difficult"                          | <input type="checkbox"/>  | <input type="checkbox"/> | <input type="checkbox"/> | <input type="checkbox"/> | <input type="checkbox"/>     |
| "I can be a scientist"                          | <input type="checkbox"/>  | <input type="checkbox"/> | <input type="checkbox"/> | <input type="checkbox"/> | <input type="checkbox"/>     |
| "I am confident speaking in front of people"    | <input type="checkbox"/>  | <input type="checkbox"/> | <input type="checkbox"/> | <input type="checkbox"/> | <input type="checkbox"/>     |
|                                                 | <i>Strongly<br/>Agree</i> | <i>Agree</i>             | <i>Neutral</i>           | <i>Disagree</i>          | <i>Strongly<br/>Disagree</i> |

**Why have you signed up for this course?**

**Do you have any expectations for the course?**

**What is the best way for you to learn new things?**

**What is science to you?**

**Would you rather explore the deep sea or deep space? Why?**

**Any other thoughts you would like to share, before we begin?**

# Mid-course Thoughts

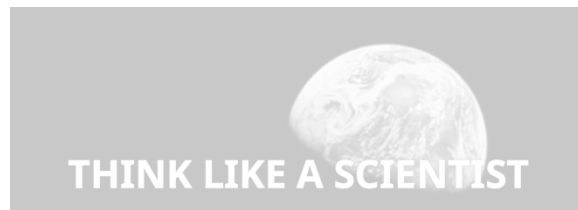

Course: *Think Like A Scientist*

Instructor: *Phil*

Rate the statement as it relates to you, feel free to use the space below each statement to add a comment:

|                                                 | <i>Strongly<br/>Agree</i> | <i>Agree</i>             | <i>Neutral</i>           | <i>Disagree</i>          | <i>Strongly<br/>Disagree</i> |
|-------------------------------------------------|---------------------------|--------------------------|--------------------------|--------------------------|------------------------------|
| "I enjoy learning about scientific discoveries" | <input type="checkbox"/>  | <input type="checkbox"/> | <input type="checkbox"/> | <input type="checkbox"/> | <input type="checkbox"/>     |
| "I am a scientist"                              | <input type="checkbox"/>  | <input type="checkbox"/> | <input type="checkbox"/> | <input type="checkbox"/> | <input type="checkbox"/>     |
| "Science is for everyone"                       | <input type="checkbox"/>  | <input type="checkbox"/> | <input type="checkbox"/> | <input type="checkbox"/> | <input type="checkbox"/>     |
| "Science is difficult"                          | <input type="checkbox"/>  | <input type="checkbox"/> | <input type="checkbox"/> | <input type="checkbox"/> | <input type="checkbox"/>     |
| "I am enjoying this education class"            | <input type="checkbox"/>  | <input type="checkbox"/> | <input type="checkbox"/> | <input type="checkbox"/> | <input type="checkbox"/>     |
| "I am confident speaking in front of people"    | <input type="checkbox"/>  | <input type="checkbox"/> | <input type="checkbox"/> | <input type="checkbox"/> | <input type="checkbox"/>     |
|                                                 | <i>Strongly<br/>Agree</i> | <i>Agree</i>             | <i>Neutral</i>           | <i>Disagree</i>          | <i>Strongly<br/>Disagree</i> |

**Which classes and activities have you enjoyed the most so far? Why?**

**What still doesn't make sense?**

**What would you like to see more of? (For example: discussions, activities, homework?)**

**Is there anything you don't like? (For example: class layout, topics, activities, environment?)**

**Anything else you would like to share?**

## W5: Art

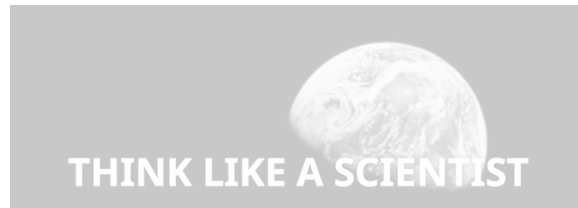

**Course:** *Think Like A Scientist*

**Instructor:** *Phil*

As we finish this fifth week, it would be amazing if we could get some feedback from you:

**Does the artwork help you remember course content on sleep? Please tick:**

Yes ☐ No ☐ A little bit ☐

**What do you remember from the sleep class based on the images?**

**Do you like the art?**

**What do you think of Artificial intelligence art? How does it make you feel?**

## W5: AI/Robots



**Course:** *Think Like A Scientist*

**Instructor:** *Phil*

More feedback if that is OK! Our standard sheet on what we've learned this week!

**Can you write down or draw any thing you remember from what we talked about regarding Artificial Intelligence and Robotics?**

**What were the emotions that you felt during this class?**

# Post-course Thoughts



Course: *Think Like A Scientist*

Instructor: *Phil*

Rate the statement as it relates to you, feel free to use the space below each statement to add a comment:

|                                                    | <i>Strongly<br/>Agree</i> | <i>Agree</i>             | <i>Neutral</i>           | <i>Disagree</i>          | <i>Strongly<br/>Disagree</i> |
|----------------------------------------------------|---------------------------|--------------------------|--------------------------|--------------------------|------------------------------|
| "I enjoy learning about scientific discoveries"    | <input type="checkbox"/>  | <input type="checkbox"/> | <input type="checkbox"/> | <input type="checkbox"/> | <input type="checkbox"/>     |
| "I am a scientist"                                 | <input type="checkbox"/>  | <input type="checkbox"/> | <input type="checkbox"/> | <input type="checkbox"/> | <input type="checkbox"/>     |
| "Science is for everyone"                          | <input type="checkbox"/>  | <input type="checkbox"/> | <input type="checkbox"/> | <input type="checkbox"/> | <input type="checkbox"/>     |
| "Science is difficult"                             | <input type="checkbox"/>  | <input type="checkbox"/> | <input type="checkbox"/> | <input type="checkbox"/> | <input type="checkbox"/>     |
| "I am enjoying my current experience of education" | <input type="checkbox"/>  | <input type="checkbox"/> | <input type="checkbox"/> | <input type="checkbox"/> | <input type="checkbox"/>     |
| "I am confident speaking in front of people"       | <input type="checkbox"/>  | <input type="checkbox"/> | <input type="checkbox"/> | <input type="checkbox"/> | <input type="checkbox"/>     |
|                                                    | <i>Strongly<br/>Agree</i> | <i>Agree</i>             | <i>Neutral</i>           | <i>Disagree</i>          | <i>Strongly<br/>Disagree</i> |



**What was the best part of the course?**

**What was the worst part of the course?**

**Did the course meet your expectations?**

**Has the course helped you in any way?**

**How can we help you learn better?**

**Does the artwork and/or music help you remember course content? Do you like them?**

**What is science to you?**

**Thinking back, what are the most memorable parts of this course?**

**Thinking back, was there anything that made you uncomfortable?**

**Which session was your most favourite and least favourite? (place an 'x')**

|                                 | <b>Most favourite</b> | <b>Least favourite</b> |
|---------------------------------|-----------------------|------------------------|
| <b>Week 1: Science of Sleep</b> |                       |                        |
| <b>Week 2: Climate change</b>   |                       |                        |
| <b>Week 3: Geoscience</b>       |                       |                        |
| <b>Week 4: Space Missions</b>   |                       |                        |
| <b>Week 5: Robots and AI</b>    |                       |                        |
| <b>Week 6: Neurodiversity</b>   |                       |                        |
| <b>Week 7: wrap up</b>          |                       |                        |

**Rate the statement as it relates to you:**

|                                                                                       | <i>Strongly<br/>Agree</i> | <i>Agree</i>             | <i>Neutral</i>           | <i>Disagree</i>          | <i>Strongly<br/>Disagree</i> |
|---------------------------------------------------------------------------------------|---------------------------|--------------------------|--------------------------|--------------------------|------------------------------|
| <b>"This class increased my interest in science"</b>                                  | <input type="checkbox"/>  | <input type="checkbox"/> | <input type="checkbox"/> | <input type="checkbox"/> | <input type="checkbox"/>     |
| <b>"The class has encouraged me to think for myself"</b>                              | <input type="checkbox"/>  | <input type="checkbox"/> | <input type="checkbox"/> | <input type="checkbox"/> | <input type="checkbox"/>     |
| <b>"The instructors were clear in presenting the material"</b>                        | <input type="checkbox"/>  | <input type="checkbox"/> | <input type="checkbox"/> | <input type="checkbox"/> | <input type="checkbox"/>     |
| <b>"The instructors were interested in questions and/or discussions during class"</b> | <input type="checkbox"/>  | <input type="checkbox"/> | <input type="checkbox"/> | <input type="checkbox"/> | <input type="checkbox"/>     |
| <b>"The course overall was interesting"</b>                                           | <input type="checkbox"/>  | <input type="checkbox"/> | <input type="checkbox"/> | <input type="checkbox"/> | <input type="checkbox"/>     |
| <b>"I would recommend the course to others"</b>                                       | <input type="checkbox"/>  | <input type="checkbox"/> | <input type="checkbox"/> | <input type="checkbox"/> | <input type="checkbox"/>     |
| <b>"The information was set at the right education level"</b>                         | <input type="checkbox"/>  | <input type="checkbox"/> | <input type="checkbox"/> | <input type="checkbox"/> | <input type="checkbox"/>     |
| <b>"I learned a lot during the course"</b>                                            | <input type="checkbox"/>  | <input type="checkbox"/> | <input type="checkbox"/> | <input type="checkbox"/> | <input type="checkbox"/>     |
| <b>"I found the course too difficult"</b>                                             | <input type="checkbox"/>  | <input type="checkbox"/> | <input type="checkbox"/> | <input type="checkbox"/> | <input type="checkbox"/>     |
|                                                                                       | <i>Strongly<br/>Agree</i> | <i>Agree</i>             | <i>Neutral</i>           | <i>Disagree</i>          | <i>Strongly<br/>Disagree</i> |

**What would you like to learn more of and how would you like to learn it?**

**What would you add, take away, rearrange, or change to improve this course?**

**What is next on your education journey? And what do you need from us?**

**Anything else you want to share, please share it below. Thank you for taking the course!**
