# Supplementary material for: Art, music, and play as a teaching aid: applying creative uses of Universal Design for Learning in a prison science class
Source: Frontiers journal article supplement (doi:10.3389/feduc.2025.1524007), 2025-02-28
Supplement: Table_1.xlsx [file Table_1.xlsx]

## Sheet: Pre
Pre-course	n =	12
	SA	A	N	D	SD
I enjoy learning about scientific discoveries	10	2
I can be a scientist	2	5	5
Science is for everyone	2	2	4	4
Science is difficult	1	3	4	4
I enjoyed my previous experiences of education	5	4	3
I am confident speaking in front of people	2	4	4	1	1

## Sheet: Mid
Mid	n =	10				Pre-course	n =	12
	SA	A	N	D	SD		SA	A	N	D	SD
I enjoy learning about scientific discoveries	10					I enjoy learning about scientific discoveries	10	2
I am a scientist		2	7	1		I can be a scientist	2	5	5
Science is for everyone	5	1	2	2		Science is for everyone	2	2	4	4
Science is difficult		1	5	3	1	Science is difficult	1	3	4	4
I am enjoying this education class	9	1				I enjoyed my previous experiences of education	5	4	3
I am confident speaking in front of people	2	4	2	2		I am confident speaking in front of people	2	4	4	1	1

## Sheet: Post
Post	n =	10				Mid	n =	10				Pre-course	n =	12
	SA	A	N	D	SD		SA	A	N	D	SD		SA	A	N	D	SD
I enjoy learning about scientific discoveries	10					I enjoy learning about scientific discoveries	10					I enjoy learning about scientific discoveries	10	2
I am a scientist	4	5		1		I am a scientist		2	7	1		I can be a scientist	2	5	5
Science is for everyone	6	4				Science is for everyone	5	1	2	2		Science is for everyone	2	2	4	4
Science is difficult		1	5	2	2	Science is difficult		1	5	3	1	Science is difficult	1	3	4	4
I am enjoying this education class	9		1			I am enjoying this education class	9	1				I enjoyed my previous experiences of education	5	4	3
I am confident speaking in front of people	4	3	1		2	I am confident speaking in front of people	2	4	2	2		I am confident speaking in front of people	2	4	4	1	1
What was the best part of the course?
I truly enjoyed the course, every part of it
The experiments made after the teaching materials. The art shared with us
Getting to be heard about what I think and how things are done. The best class was the universe class because I never really knew anything about space.
All of it. Especially the weeks on AI and Neurodiversity
The group discussions and the charts, games, and experiments
Learning about Earth and outer space
I like the resources (reading materials). I like the answers/follow up pages the following week.
Everyday to learn something I didn't know in the first place
Learning things I never would have without this course
What was the worst part of the course?
only 7 weeks. I feel 2 weeks on each topic would be more benefical
The AI was kinda creepy
N/A
The course ending
The end! :(
Missing out. REDACTED.
When I couldn't be there
I did not like the weekly "what do you remember & how did it make you feel"?
When I missed class
Having to leave for other appointments
Did the course meet expectations?
Surprisingy I am intrigued and inspired at the age of REDACTED. So much appreciation… the sun is always shining
Yes it did, I learned so much
Overpowered, my expecations to thumb through only
YES!
Yes, beyond my expectations
Yes
Yes
100%!
All the way
It surpassed my expectations
Has the course helped you in any way?
See above response
Yes, I am definetly interest
Yes, it has rearranged my mind in thinking logically
Yes, it got me believing I can do any experiment even if I fail the experiment, it still makes me a scientist.
Yes, I've learned a lot
Made me more interested in science. Made me feel like I can become a scientist
I learned stuff I didn't know before
Helped me improve my critical thinking skills
Yes it gives me something to think about and something to talk to my son and everyone I talk with
It has helped me realise how important sleep is
How can we help you learn better?
Study more
More arts and music please
I enjoyed every part…
Get people to ask questions. Music.
Give out more hand outs
Use different coloured markers for different sections on the board during group discussions
I think how you guys let us teach each other what we know is a fun way
Does the artwork and/or music help you remember course content? Do you like them?
Yes, music has colours, colours build intrege and curiousity
Yes, I love the way you taught sleep curves and the importance of changes.
Yes, I enjoy the artwork = it remind me of our overall sleep and science can be put into art, as well as music = I try and find the words used that I put in
Yes, music and art are great
Yes. I am an art person so this helps me thrive
Yes, the art and music was great
Art and music always help me recall content and I appreciate and enjoy them.
Yes I like to see what it is we did put in to art/music
Yes! I always find music helps with everything and I love them
What is science to you?
Science is everywhere and needs to be explored
A logical thinking and experimental connections
Trying something new to see how the outcome is, if you fail, try again. Science is not perfect, but it is fun!
Asking questions and finding answers
Learning, education, discussions, theories, curiousity, experiments, questions.
Learning and experimenting new things
Science to me is learning, discovering, and questioning
It is everything all around us how we eart, talk, walk and think
Science is everything around us
Thinking back, what are the most memorable parts of this course?
Song created a vision of commerical to bring awareness and encourage change and appreciation for Mother Earth
Every part of it was very informative
Geoscience on the earthquakes
Drawing the ages on your arm/hand. The music, the art, the amazing teacher.
Sleep, AI, and neuro
The art, music, discussions. The things that I learn that I can take home (in my mind) from the course
When we got more in depth about each subject
I REALLY liked the maps that showed the evolution of oceans and continents.
The sleep work it made me know how little sleep I need, then how much I want
The games, the song, and the joking back and forth

## Sheet: Post Part 2
Post	n =	10
	SA	A	N	D	SD			Most favourite	Least favourite
This class increased my interest in science	8	2					Science of sleep	1
Thie class has encouraged me to think for myself	9		1				Climate change
The instructors were clear in presenting the material	10						Geoscience	2
The instructors were interested in questions and/or discussions during class	9	1					Space missions		1
the course overall was interesting	9	1					Robots and AI	1	2
I would recommend this course to others	10						Neurodiversity	2	1
The information was set at the right education level	8	2					Wrap up		3
I learned a lot during the course	9	1					All	2
I found the course too difficult				2	8
What would you like to learn more of and how would you like to learn it?
Deep sea underworld
When I get our hopefully soon I will go and learn more
More about forecasting earthquakes. I would like to learn from previous events and scientists opinion.
Nothing it was amazing!
AI - what's out there what's soon to come (e.g., deep fake, chatgpt)
More about the body, mind, maybe dreams. I did learn about so many things I did not know anything about.
Geoscience. I think the classes should be more than 8 weeks
Deep space. Videos and different discoveries along with evolution of tools used for discoveries
How our bodies work, my brain, what our body looks like when we think
I would like to learn more about our environment, how this course was taught
What would you add, take away, rearrange, or change to improve this course?
Nothing, thumbs up!
A little less on neurodiversity may improve the course
Nothing
N/A
Nothing
I like it the way it is
Thanks Phil
I wouldn't change a thing
What is next on your education journey? And what do you need from us?
I'm not sure but I'm now exploring the idea
Just finished grade 11 maths, I'm going on to English
To take forecasting courses on the earthquake prediction. Please refer some good books, magazines
I want to do experiments
[University] - youth and criminal justice. Emotional support.
College courses/university courses. Degrees and programs
Maybe going to take some post-secondary
I am hoping to take a 'practical herbalist program' in sept. Maybe info on practical medical flowers
Whatever came up
I would like any help I can get
Anything else you want to share, please share it below. Thank you for taking the course!
Thank you :)
Yes, you are truly a awesome and a wonderful teaching
Thank you, Phil and your team
You were an amazing teacher! Thank you for coming!
Thank you for visiting us every week. I love these classes.
Thank you
Thanks for think of us

## Sheet: Art
Art W5
Does the artwork help you remember the course content on sleep?
	Yes	9	1
	No
	A little bit
What do you remember from the sleep class based on the images?
The sleep has cycles
The more sleep you get the smaller the bars get
REM Cycle
The sleep graphs
That you much go through each stage (1-4) and back up (4-1) to reach REM sleep
I remember the REM cycle
REM/ Not getting enough sleep. Limited sleep and being able to function
That you need to get to the bottom of the stages to have a full rest of stage
The REM pattern. The sleep game - what things help us sleep and what effects our sleep
Do you like the art?
Yes
Yes
Yes
Yes
Yes
Yes. Art is always a soothing component
Enjoy art
Yes
Yes, it was hard to tell which one was AI or human

## Sheet: Chart
	SA	A	N	D	SD								SA	A	N	D	SD
Science is for everyone	0.6	0.4	0	0	0	Science is for everyone	5	1	2	2		Science is for everyone	0.166667	0.166667	0.333333	0.333333	0
	6	4	0	0	0								2	2	4	4	0

## Sheet: Climate change
W2: climate change
Can you write down or draw anything you remember from what we talked about regarding climate change?	What were the emotions that you felt during this class?
The atmosphere--> temp increase. How to positively change the way we do things to help the environment	It was very interesting, happy to learn new things
Insured catastrophic losses (different kind of insuraces). How health blends into climate change. Factors that could lead to food and water insecurity. The biggest producers of greenhouse gas.	Interested. Intreged.
We talk food insecurity. We talk about Svente Arrenhius gave his warning Carbon Dioxide.	Happy for the new information.
Health: diet, exericse. Climate change: food, tech, fashion. Lose an hour of sleep: shitty loud guards, bad room mates. Pro tips: ear plugs, fan/white noise.	Excited to learn and share :)
global warming/greenhouse gasses and biggest producers and producers. Sea level change/melting icecaps. Wildfire spreading. Pollution. Ozone disappearing. Renewable energy. Fossil energy. Energy industries. Transport. Manufacturing. Agriculture. Food retail. Fashion retail.	Happy and relaxed. Interested.
We need to make serious changes or we are in serious trouble	I actually felt ashamed for all the stuff I could have done to help but haven't
The amount of waste in my life has impacted the environment… what am I willing to do about it and can I committ to it?	Struggle with perfume makes me frustrated and angry have a headache.
We talk about how climate change and the thing that make climate change a big thing. That we need to change.	I like hearing what the class had to say about the world and its needs. Thanks.
Saving the climate. Differences between countries. What we can do naturally. Difference over time. How we measure climate change. Who invented measure of change.	Interested. Felt educated. Happy. Got excited sometimes.
I remember the fire burning in different areas like Canada and America. Thinking solution that will end it.
Picture of polar bear on ice	It makes me sad to think of the consistent devastation and pressure that humanity places on all of our ecosystems. People always think it will be the great minds of the next generation that solve the issues but eventually the planet will be unable to support a 'next generation' and all of the great minds, great ideas, and great initatives that were never initatied will be for nothing. It makes me…

## Sheet: W1
W1: sleep
Can you write down or draw anything you remember from what we talked about regarding sleep?	What were the emotions that you felt during this class?
The sleep cycle, REM placement	Frustraion
sleep cycle	Interested
Z game	Tired, happy
Sleep cycle, sleep stages	Excited
1. the why and how on the 'sleep'; 2. the scientific explanation for pros and cons of common sleeping habits/shortages; 3. Stages of sleep cycle; 4. Dreams, REM, and brain activities; 5. sleep paralysis; 6. scientific methods	From doubt to confused, to enjoying, then to satified
sleep, disturbances, body temp, circadian rhythms, impact of light, exercise, caffeine, sleep apnea, night terrors, paralysis, anatomy, AI, Chemistry	Excited, interested
The less you sleep the more injuries you have; the less you sleep the more likely it is to be involved in bad behaviours; not sleeping for 20hours = legally drunk. Sleep game (all the setbacks that happens that intercept our sleep). Sleep cycle (stage 1 5-10 mins; stage 2 20 mins; Stage 3 (30 mins); stage 4 (deepest sleep, heals damages)	Excited, curious, tired
Z game, 4 stages of sleep and REM	Excited, ready to learn
without sleep you get grumpy. Hallucination. Anger.	Happy
I missed the class with an appointment. But when I arrived I remebered the class bringing up sleep walking, sleep sex	I was interested
not enough - crazy (don't sleep). 8 hours. Body temp. Body need sleep. Cycles. Heals damages. Why? Thinking. Dreams. Aches/pains. Too much. Sleep walking. Eay sleep. Sleep sex.	Some of the ladys were wearing something that was making it hard for me to breathe. I like it it was fun. Happy. Why come and take someone's spot if your going to sleep.
I remember that I do go to bed at 12.30am. I remember that when my kids are fight I send them to bed	sad. Disturb.
